# Supplementary material
Source: publisher figshare collection journal article supplement (https://acs.figshare.com/ndownloader/files/4189231)
Supplement: Supplementary file 1 [file 4189231]

## Energy and Electron Transfer from Fluorescent Mesostructured Organosilica Framework to Guest Dyes

Norihiro Mizoshita, Ken-ichi Yamanaka, Satoru Hiroto, Hiroshi Shinokubo, Takao Tani, and Shinji Inagaki\*

### 1. Supplementary Spectroscopic, X-Ray Diffraction, and Microscopic Data

Figure S1 shows the UV-vis absorption and fluorescence spectra of the solutions of the PBI dyes **1–4** in THF. The spectral shapes were very similar due to the same chemical structure of the PBI chromophore. The fluorescence quantum yields ( $\Phi$ ) of the PBI dyes were higher than 0.7 except for dye **4** exhibiting self-quenching with amino groups. However, protonation of the amino groups by the addition of a small amount of HCl aq. resulted in large enhancement of  $\Phi$  from 0.03 to 0.83.

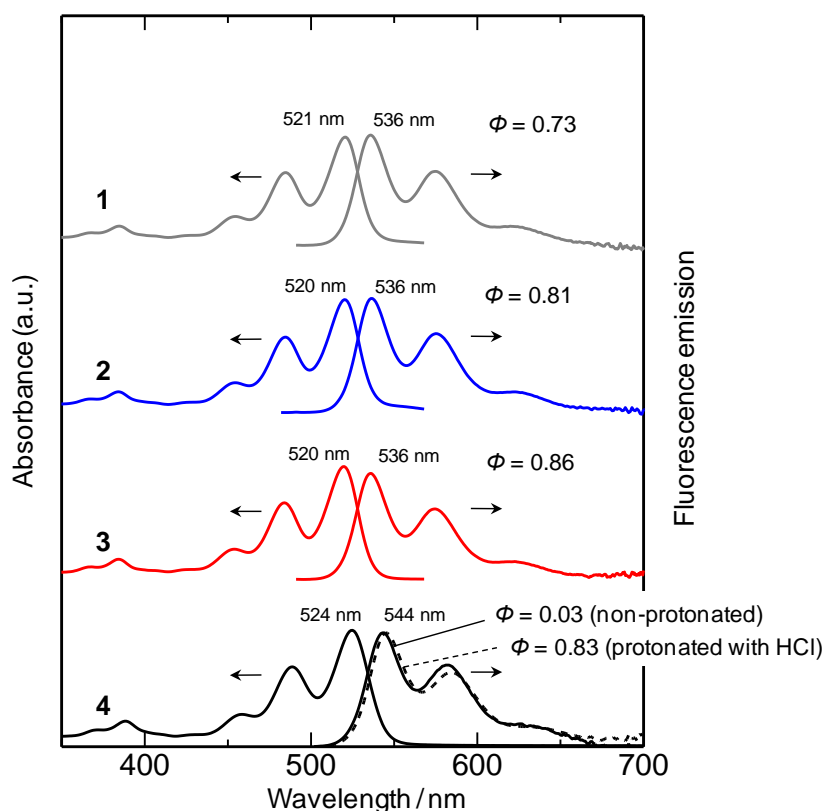

**Figure S1.** (a) UV-vis absorption and (b) fluorescence (excited at  $\lambda = 490$  nm) spectra of solutions of **1–4** in THF.

Figure S2a show the UV-vis absorption spectrum of the **Brij76-TPPy/3** film containing 5 mol% of **3**. The absorption maximum wavelength of the doped dye is 519 nm, which is almost the same with that in a THF solution (520 nm). Upon direct excitation of the PBI moiety at  $\lambda = 490$  nm, the dye **3** exhibited monomer-band emission as shown in Figure S2b. These results indicate that the dye **3** is well dispersed in the host **Brij76-TPPy** film without aggregation.

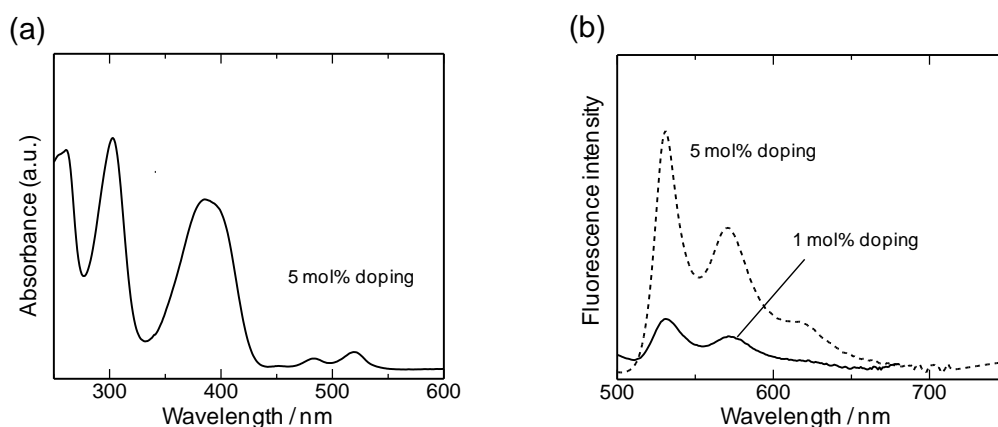

**Figure S2.** (a) UV-vis absorption and (b) fluorescence (excited at  $\lambda = 490$  nm) spectra of **Brij76-TPPy/3** films.

Figure S3 shows a transmission electron microscope (TEM) image of **P123-TPPy** and XRD patterns of the host films, **P123-TPPy**, **Brij76-TPPy**, and **P123-silica**. For the TEM image of **P123-TPPy** (annealed at 200 °C for 6h and immersed in ethanol to extract P123), we can see channel-like structures with a periodicity of ca. 6–9 nm (Figure S3a). As shown in Figure S3b–d, all the films have periodic mesostructures with  $d$ -spacing values of 5.6–10.5 nm. The TPPy-based films, **P123-TPPy** and **Brij76-TPPy**, exhibited several higher order diffraction peaks, which indicates that these films form a 2D hexagonal mesostructure.

Figure S4 shows optical microscope images of the **P123-TPPy** films containing PBI dyes **1–4** (5 mol%). We can see that only dye **1** forms micrometer-scale large aggregates observable under optical microscopy. Different distribution of the other three dyes (**2**, **3**, and **4**) is not distinguishable by optical microscopy.

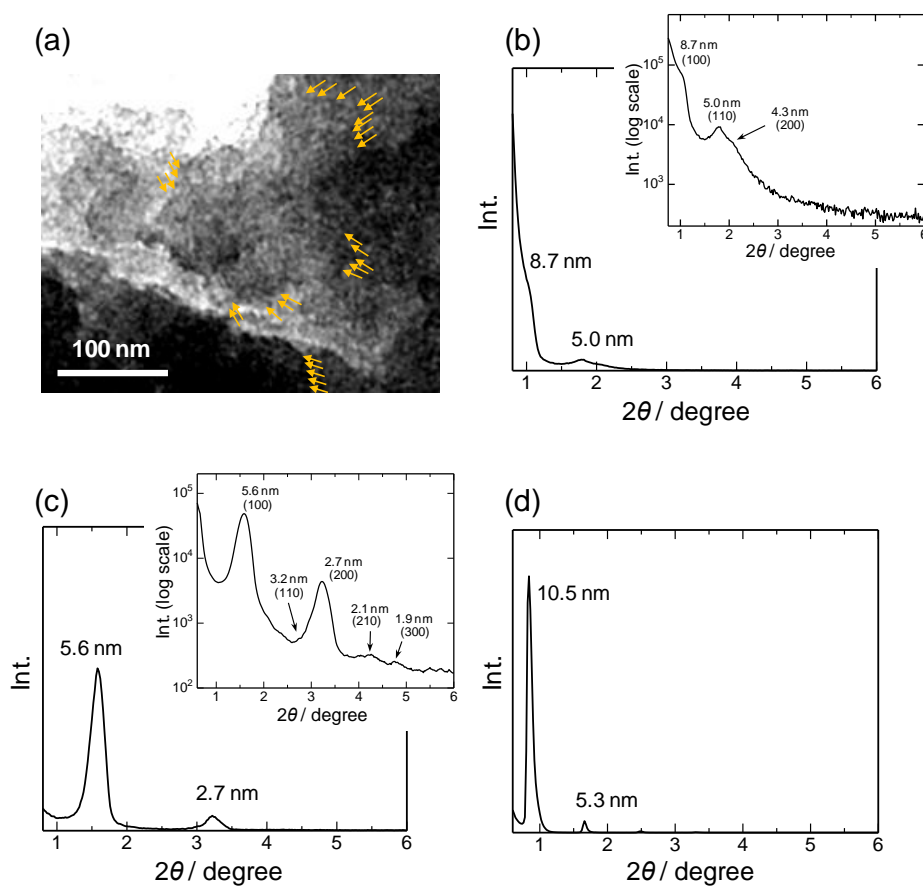

**Figure S3.** (a) TEM image of **P123-TPPy**. (b–d) X-ray diffraction patterns of mesostructured films: (b) **P123-TPPy**, (c) **Brij76-TPPy**, and (d) **P123-silica**.

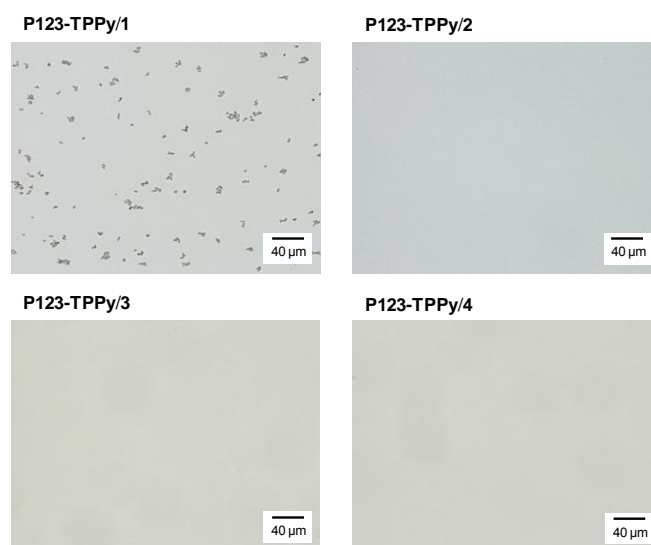

**Figure S4.** Optical microscope images of **P123-TPPy** films containing PBI dyes **1–4** (5 mol%).

## 2. Calculation of Critical Förster Radius

The critical Förster radius  $R_0$  is expressed as equation (1):

$$R_0^6 = \frac{9000(\ln 10)\kappa^2\Phi_D I}{128\pi^5 N_A n^4} \quad (1)$$

Where  $\Phi_D$  is the photoluminescence quantum yield of the energy donor (**P123-TPPy**),  $n$  is the refractive index of the film,  $N_A$  is Avogadro's number,  $\kappa^2$  is an orientation factor ( $\kappa^2 = 2/3$  for randomly oriented dipoles), and  $I$  is the overlap integral of the overlap function,  $J(\lambda)$ , over the full spectrum. From the spectral overlap between the emission of **P123-TPPy** and absorption of the PBI dye,  $J(\lambda)$  and  $I$  are calculated using the equations (2) and (3):

$$J(\lambda) \cong \lambda^4 \times PL_{\text{corr}}(\lambda) \times \varepsilon(\lambda) \quad (2)$$

$$I = \int J(\lambda) d\lambda \quad (3)$$

Where  $PL_{\text{corr}}(\lambda)$  is the fluorescence intensity of **P123-TPPy** as a function of  $\lambda$ , corrected to be

$$\int PL_{\text{corr}}(\lambda) d\lambda = 1 \quad (4)$$

and  $\varepsilon(\lambda)$  is the molar decadic extinction coefficient of the PBI dye as a function of  $\lambda$  ( $\varepsilon = 5.4 \times 10^4 \text{ M}^{-1}\text{cm}^{-1}$  at  $\lambda = 520 \text{ nm}$ ). In the present study, an absorption spectrum of the PBI dye measured in a dilute THF solution was used.

Figure S5 shows the overlap function  $J(\lambda)$  for the combination of **P123-TPPy** (energy donor) and **2** (energy acceptor). The overlap integral was calculated to be  $I = 9.93 \times 10^{-14} \text{ cm}^3 \text{ M}^{-1}$ . Assuming  $\Phi_D = 0.70\text{--}0.75$  and  $n = 1.5$ , the Förster radius  $R_0$  is approximately 4.5 nm. Calculation of  $R_0$  using absorption spectra of dyes **1**, **3**, and **4** gave almost the same value.

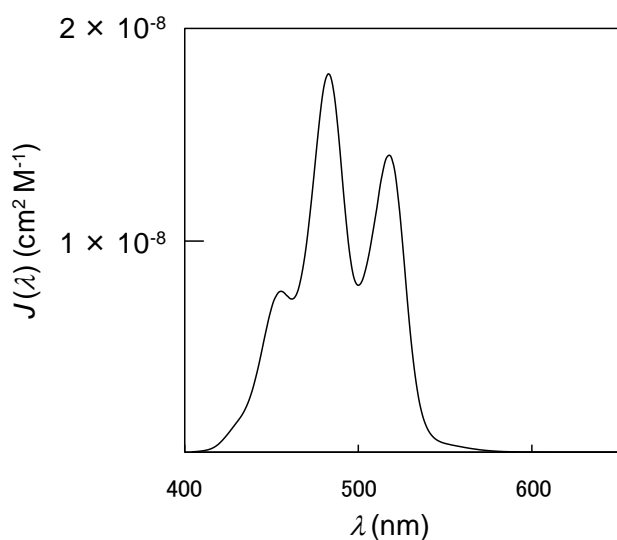

**Figure S5.** Overlap function  $J(\lambda)$  of **P123-TPPy** (energy donor) and **2** (energy acceptor) calculated using the spectra shown in Figure 3.

### 3. Supporting Data for Transient Absorption Spectroscopy

Figure S6 shows the absorption spectra of TPPy cationic radical (TPPy<sup>•+</sup>) and PBI anionic radical (PBI<sup>•-</sup>), which were prepared by chemical oxidation or reduction of a corresponding reference compound, respectively.

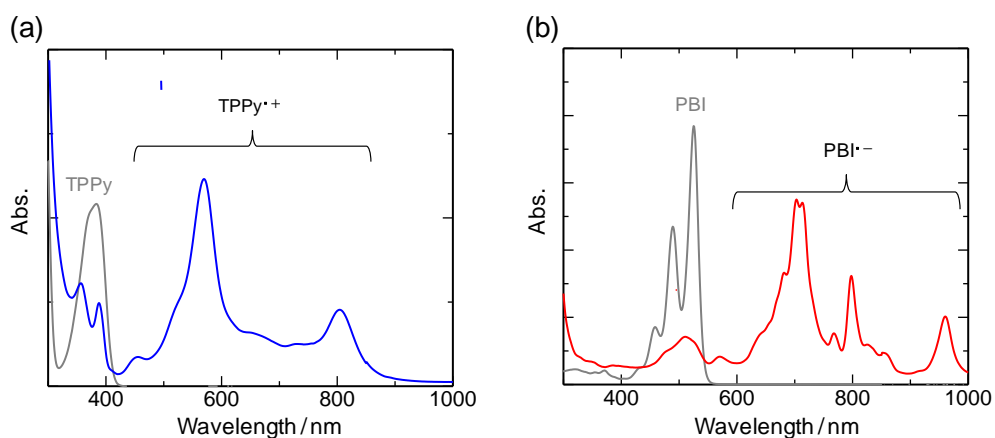

**Figure S6.** UV-vis spectra of (a) a TPPy cationic radical prepared by oxidation of 1,3,6,8-tetraphenylpyrene with  $\text{SbCl}_5$  in  $\text{CH}_2\text{Cl}_2$  and (b) a PBI anionic radical prepared by reduction of  $N,N'$ -bis(3-pentyl)perylene tetracarboxylic acid bisimide with hydrazine monohydrate in DMF.

Figure S7 shows the optical properties of a **P123-silica/4** film (P123/4 = 100/8.7, w/w) containing no TPPy bridging group. The  $\lambda_{\text{max}}$  of the film is 492 nm, which is 32 nm shorter than that of the solution of **4** in THF (524 nm), and the fluorescence spectrum shows a broad excimer-band-like emission at  $\lambda = 608$  nm. These results indicate that the dye molecules partially aggregate in the film due to the excessive doping.

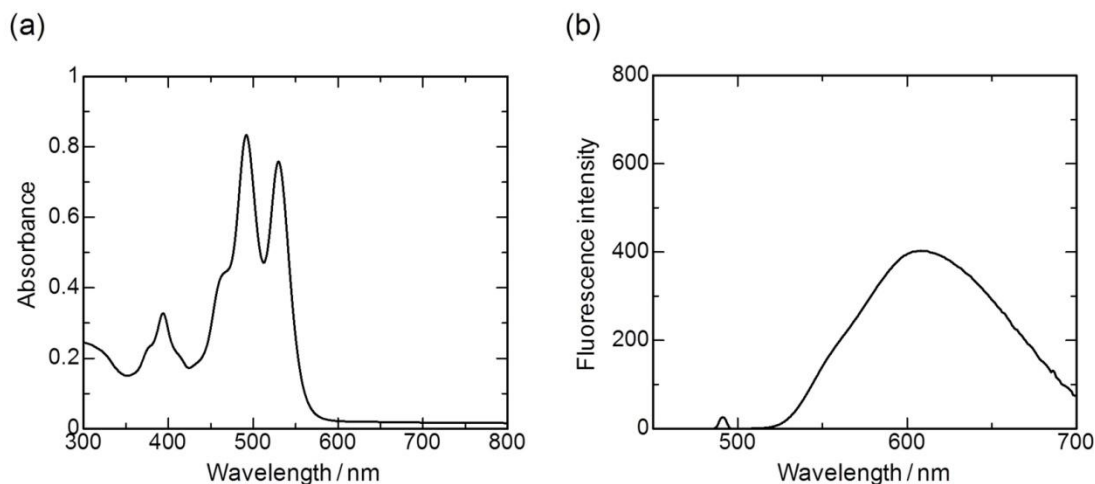

**Figure S7.** (a) UV-vis absorption and (b) fluorescence (excited at  $\lambda = 490$  nm) spectra of the **P123-silica/4** film (P123/4 = 100/8.7, w/w).

The transient absorption spectra of the excessively-doped **P123-silica/4** film are shown in Figure S8. A broad absorption band at  $\lambda = 765$  nm appeared, accompanied with an intense bleaching observed at  $\lambda = 490$  and 532 nm. The absorption band at  $\lambda = 765$  nm is attributable to the excited species of the partially formed dye aggregates.

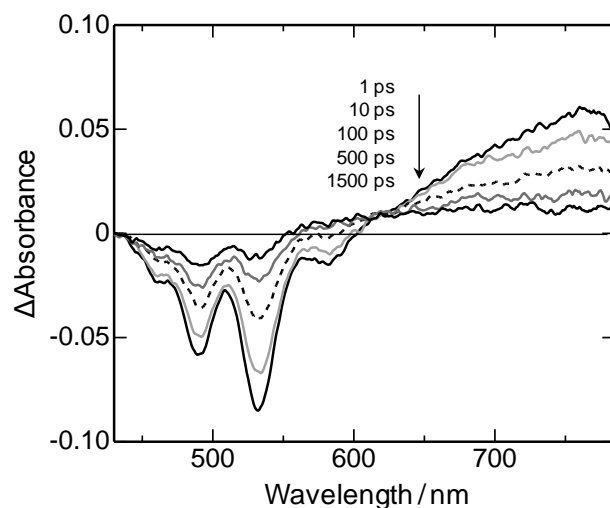

**Figure S8.** Transient absorption spectra of the **P123-silica/4** film after excitation at  $\lambda = 530$  nm.
